# Supplementary material for: Modulation of cell wall synthesis and susceptibility to vancomycin by the two-component system AirSR in Staphylococcus aureus NCTC8325
Source: PubMed Central journal article supplement (PMC4029521; doi:10.1186/1471-2180-13-286), 2013-12-10
Supplement: 1471-2180-13-286-S3.pdf [file 1471-2180-13-286-S3.pdf]

## Conservative region of *ddl* promoter in *Staphylococci*

### Section 1

|                     | (1) | 1               | 10           | 20                  | 30        | 40              | 50 |
|---------------------|-----|-----------------|--------------|---------------------|-----------|-----------------|----|
| p-ddl-8325          | (1) | -----           | -----        | CTCACTAATGTTTATATCA | ---       | ATTTTACATGACTTT | T  |
| p-ddl-Mu50          | (1) | -----           | -----        | CTCACTAATGTTTATATCA | ---       | ATTTTACATGACTTT | T  |
| p-ddl-MW2           | (1) | -----           | -----        | CTCACTAATGTTTATATCA | ---       | ATTTTACATGACTTT | T  |
| p-ddl-S.capitis     | (1) | -----           | -----        | ATAAATAG-TCTACATTG  | ---       | ATTTTACATGACTTT | T  |
| p-ddl-S.caprae      | (1) | -----           | -----        | ATAAATAG-TCTACATTG  | ---       | ATTTTACATGACTTT | T  |
| p-ddl-S.epidermidis | (1) | ---             | TTCATTCATATT | TTCTAATCAAA         | TATATATTA | ATTTTACATGACTTT | C  |
| p-ddl-S.pasteuri    | (1) | ATAATCTTTCATCTT | TCATCCATAA   | TATATAA             | CG        | ATTTTACATGACTTT | T  |
| p-ddl-S.warneri     | (1) | -TAATCATTCATCTT | TCATCCATAA   | TATATAA             | CG        | ATTTTACATGACTTT | T  |
| p-ddl-S.simiae      | (1) | -----           | -----        | CACACTTATAGTTATTTTA | ---       | ATTTTACATGACTTT | T  |
| p-ddl-N315          | (1) | -----           | -----        | CTCACTAATGTTTATATCA | ---       | ATTTTACATGACTTT | T  |

### Section 2

|                     | (51) | 51   | 60                 | 70             | 80                 | 90       | 100 |
|---------------------|------|------|--------------------|----------------|--------------------|----------|-----|
| p-ddl-8325          | (35) | TTAA | AAATTAGCTAGAATATCA | CAGTGATATCAGC  | TATAGATTTCA        | AATTT    | T   |
| p-ddl-Mu50          | (35) | TTAA | AAATTAGCTAGAATATCA | CAGTGATATCAGC  | TATAGATTTCA        | AATTT    | T   |
| p-ddl-MW2           | (35) | TTAA | AAATTAGCTAGAATATCA | CAGTGATATCAGC  | TATAGATTTCA        | AATTT    | T   |
| p-ddl-S.capitis     | (33) | TTTT | AAATTGCTAGAATATCA  | AAG---         | TGGCAAGTCGACAAATTA | TATA     | A   |
| p-ddl-S.caprae      | (33) | TTTT | AAATTGCTAGAATATCA  | AAG---         | TGGCAAGTCGACAAATTA | TATA     | A   |
| p-ddl-S.epidermidis | (48) | TTTT | AAATTGCTAGAATATCA  | CAG---         | AATGATAGCACCTTATTA | ACTT     | T   |
| p-ddl-S.pasteuri    | (51) | ATAG | AAATTGCTAGAATATCA  | AAGTCTAAATGCAA | TAACCAATTTA        | TTTC     | T   |
| p-ddl-S.warneri     | (50) | ATAG | AAATTGCTAGAATATCA  | AAGTCAATGCAA   | TAACCAATTTA        | TTTC     | T   |
| p-ddl-S.simiae      | (36) | TACT | AAATTAGCTAGAATATCA | CAGATGATAAA    | CAACTAGAA          | TACATAAC | T   |
| p-ddl-N315          | (35) | TTAA | AAATTAGCTAGAATATCA | CAGTGATATCAGC  | TATAGATTTCA        | AATTT    | T   |

### Section 3

|                     | (101) | 101  | 110      | 120                | 130            | 140          | 150     |
|---------------------|-------|------|----------|--------------------|----------------|--------------|---------|
| p-ddl-8325          | (85)  | GAA  | TAGGA--- | ATAAAATAGAAGGGAATA | -TTGTTCTGATTA  | TAAATGA      | A       |
| p-ddl-Mu50          | (85)  | GAA  | TAGGA--- | ATAAAATAGAAGGGAATA | -TTGTTCTGATTA  | TAAATGA      | A       |
| p-ddl-MW2           | (85)  | GAA  | TAGGA--- | ATAAAATAGAAGGGAATA | -TTGTTCTGATTA  | TAAATGA      | A       |
| p-ddl-S.capitis     | (80)  | GAA  | TAAGCT-- | TCTTTTCCATTCAAG--  | G              | TAGAGGAATTA  | CAAG-   |
| p-ddl-S.caprae      | (80)  | GAA  | TAAGCT-- | TCTTTTCCATTCAAG--  | G              | TAGAGGAATTA  | CAAG-   |
| p-ddl-S.epidermidis | (95)  | TTAA | TATGTA-- | ATAGTCATAATAAA     | AATATG         | TATATAGCGC   | AAATG-  |
| p-ddl-S.pasteuri    | (101) | ATAG | AAGT---  | ATTAGATTAATA       | -TAGG-         | TTTGGTTAAACA | ACTTTG- |
| p-ddl-S.warneri     | (100) | TAG  | GGAGT--- | ATTAGATTAATA       | -TAGG-         | TTTGGTTAAAGA | ACTTTG- |
| p-ddl-S.simiae      | (86)  | GAA  | TAA      | CAATTGATAA         | TCTTAAGAGAACT- | GTAACATAATTA | GATAGGG |
| p-ddl-N315          | (85)  | GAA  | TAGGA--- | ATAAAATAGAAGGGAATA | -TTGTTCTGATTA  | TAAATGA      | A       |

### Section 4

|                     | (151) | 151                        | 160                   | 170   | 180      | 190         | 200      |
|---------------------|-------|----------------------------|-----------------------|-------|----------|-------------|----------|
| p-ddl-8325          | (131) | ATCAACATAGATACAGACACATAAGT | CCTCGT                | TTT   | TAAAATGC | AAAAATAG    | T        |
| p-ddl-Mu50          | (131) | ATCAACATAGATACAGACACATAAGT | CCTCGT                | TTT   | TAAAATGC | AAAAATAG    | T        |
| p-ddl-MW2           | (131) | ATCAACATAGATACAGACACATAACG | CCTCGT                | TTT   | TAAAATGC | AAAAATAG    | T        |
| p-ddl-S.capitis     | (125) | --TCACTAA                  | AAATTAGATTTATG--      | A     | TGGA     | TTAACAAATGC | AAATGAT  |
| p-ddl-S.caprae      | (125) | --TCACTAA                  | AAATTAGATTTATG--      | A     | TGGA     | TTATCAAATGC | AAATGAT  |
| p-ddl-S.epidermidis | (142) | --TCA                      | TAAATTTAGTTCTATAT--   | T     | TAGA     | TTATCAAATGC | AAATGAA  |
| p-ddl-S.pasteuri    | (145) | --CCATATAT                 | ATTAATAGA             | ----- | -----    | TTATAAAATGC | AAAAAGTC |
| p-ddl-S.warneri     | (145) | --CCCTTT                   | ATTAATAGA             | ----- | -----    | TTATAAAATGC | AAAAAGTC |
| p-ddl-S.simiae      | (135) | A-CGGTAA                   | ATTCACATT-ATAGCGCTT-- | A     | TTT      | TGAAATGC    | AAAAATA  |
| p-ddl-N315          | (131) | ATCAACATAGATACAGACACATAAGT | CCTCGT                | TTT   | TAAAATGC | AAAAATAG    | T        |

|                           | (201) | 201      | 210    | 220      | 230    | 240    | 250               |
|---------------------------|-------|----------|--------|----------|--------|--------|-------------------|
| p-ddl-8325 (181)          | CAT   | TAAAAT   | GTGATA | CTATTAAG | ATTCAA | GATGCG | ---AATAAATCAAT    |
| p-ddl-Mu50 (181)          | CAT   | TAAAAT   | GTGATA | CTATTAAG | ATTCAA | GATGCG | ---AATAAATCAAT    |
| p-ddl-MW2 (181)           | CAT   | TAAAAT   | GTGATA | CTATTAAG | ATTCAA | GATGCG | ---AATAAATCAAT    |
| p-ddl-S.capitis (170)     | T     | TAGAAAT  | ATGATA | AATTAAGT | TTCA   | GAGAC  | -CGTTATGTACAT-TGA |
| p-ddl-S.caprae (170)      | T     | TAGAAAT  | ATGATA | AATTAAGT | TTCA   | GAGAC  | -CGTTATGTACAT-TGA |
| p-ddl-S.epidermidis (187) | T     | TAGAAAT  | ATGATA | AATTAAGT | TTCA   | GAGAC  | -CGTTATGTACTT-AAA |
| p-ddl-S.pasteuri (180)    | C     | TATCAAAT | ATGATA | AATTAAGT | TTCA   | GAGAA  | GACTT-TGTATATTAAA |
| p-ddl-S.warneri (180)     | C     | TATCAAAT | ATGATA | AATTAAGT | TTCA   | GAGAA  | GACTT-TGTATATTAAA |
| p-ddl-S.simiae (181)      | C     | ATAAAT   | ATGATA | CTATTAAG | TTCAA  | GATGCG | CGATTAAATGAAA     |
| p-ddl-N315 (181)          | CAT   | TAAAAT   | GTGATA | CTATTAAG | ATTCAA | GATGCG | ---AATAAATCAAT    |

## Section 6

|                           | (251) | 251    | 260    | 270          | 280        | 290       | 300                  |
|---------------------------|-------|--------|--------|--------------|------------|-----------|----------------------|
| p-ddl-8325 (228)          | T     | AACAAT | AGGACT | AAATCAATATTA | -ATTTATAT  | TAAAGGTAG | GCAAACCT             |
| p-ddl-Mu50 (228)          | T     | AACAAT | AGGACT | AAATCAATATTA | -ATTTATAT  | TAAAGGTAG | GCAAACCT             |
| p-ddl-MW2 (228)           | T     | AACAAT | AGGACT | AAATCAATATTA | -ATTTATAT  | TAAAGGTAG | GCAAACCT             |
| p-ddl-S.capitis (218)     | G     | CTATAC | ATAATA | ATAAATATCA   | CAATTAT    | TAAACAG   | GATAAATGGCAT         |
| p-ddl-S.caprae (218)      | G     | CTATAC | ATAATA | ATAAATATCA   | CAATTAT    | TAAACAG   | GATAAATGGCAA         |
| p-ddl-S.epidermidis (235) | G     | TAGTAA | ATAAA  | AGATCAAT     | TAAACA     | ATTACG    | TAAAGA-AAAAGGC-T     |
| p-ddl-S.pasteuri (229)    | A     | ATACAT | ATAT   | TAAAAGTAA    | ATTT-TAAA  | ATGATAAG  | -ACGTTATTCCA         |
| p-ddl-S.warneri (229)     | A     | ATACAT | ATGAT  | TAAAAGTAA    | ATTT-TAAA  | ATGATAAG  | -ACGTTATGCCA         |
| p-ddl-S.simiae (231)      | A     | TAA    | TAA    | TAA          | CCACATCAAT | TTTA-AT   | TATGATAGCTATGCTAT--- |
| p-ddl-N315 (228)          | T     | AACAAT | AGGACT | AAATCAATATTA | -ATTTATAT  | TAAAGGTAG | GCAAACCT             |

## Section 7

|                           | (301) | 301       | 310      | 320       | 333             |
|---------------------------|-------|-----------|----------|-----------|-----------------|
| p-ddl-8325 (277)          | G     | ATATATCAT | TGGAG    | GAAAACGAA | -----           |
| p-ddl-Mu50 (277)          | G     | ATATATCAT | TGGAG    | GAAAACGAA | -----           |
| p-ddl-MW2 (277)           | G     | ATATATCAT | TGGAG    | GAAAACGAA | -----           |
| p-ddl-S.capitis (268)     | A     | TAA       | GCCGAGTA | AATTGTA   | ATGGAGGAAAACGAA |
| p-ddl-S.caprae (268)      | A     | TAA       | GCCGAGTA | AATTGTA   | ATGGAGGAAAACGAA |
| p-ddl-S.epidermidis (283) | A     | AAAGAA    | CTGTA    | AATTGTA   | -----           |
| p-ddl-S.pasteuri (277)    | T     | AGCGTAT   | AT       | TGGAG     | GAAAACGAA       |
| p-ddl-S.warneri (277)     | T     | AGCGT     | TTAT     | TGGAG     | GAAAACGAA       |
| p-ddl-S.simiae (277)      | A     | ATATATCAT | TGGAG    | GAAATTAAC | -----           |
| p-ddl-N315 (277)          | G     | ATATATCAT | TGGAG    | GAAAACGAA | -----           |

## Potential AirR binding sequence

Among the conservative regions of *ddl* promoter squared in red, only the sequence under blue line can be found in other AirR direct targets. The sequences was analyzed using MEME and listed below. The sequence conservation, measured in bits, is shown as the height of a stack of letters at each base position.

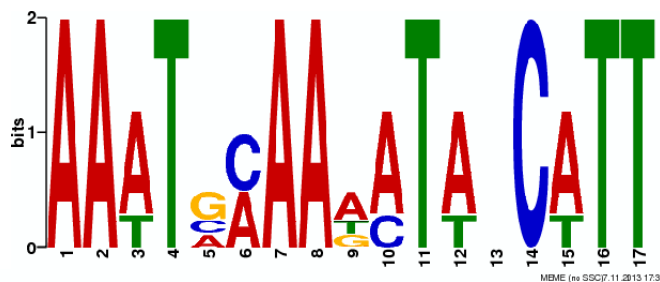

| Name   | p-value  | Sites                                 |
|--------|----------|---------------------------------------|
| p-ddl  | 2.52e-09 | GTTTTTA AAATGCAAAATAGCATT AAAATGTGAT  |
| p-capA | 1.77e-07 | ATCAGTG AAATCAAAGATATCATT CAAACATCAT  |
| p-pbp1 | 6.86e-07 | ACTTTTCG AAATACAATATTCCATT AGAAAAAGTG |
| p-lytM | 1.11e-06 | ACAGTTT AATTGAAAACCTAATTT AACTTTAATG  |
