# Supplementary material for: Modulation of cell wall synthesis and susceptibility to vancomycin by the two-component system AirSR in Staphylococcus aureus NCTC8325
Source: PubMed Central journal article supplement (PMC4029521; doi:10.1186/1471-2180-13-286), 2013-12-10
Supplement: 1471-2180-13-286-S4.pdf [file 1471-2180-13-286-S4.pdf]

|                          | Previous report <sup>b</sup> |            |                      |              | Our result          |                           |                          |
|--------------------------|------------------------------|------------|----------------------|--------------|---------------------|---------------------------|--------------------------|
|                          | microarray                   |            | RT-qPCR              |              | microarray          | RT-qPCR                   |                          |
|                          | $\Delta$ airR/Newman         |            | $\Delta$ airR/Newman |              | $\Delta$ airSR/8325 | $\Delta$ airSR/8325       |                          |
|                          | midlog                       | stationary | midlog               | stationary   |                     | aerobic <sup>c</sup>      | anaerobic                |
| <i>cap5A</i>             | 4.92                         | 45.71      | 2.81 ± 0.53          | 5.76 ± 0.08  | -3.61               | -1.97 ± 0.07 <sup>d</sup> | 1.26 ± 0.13 <sup>d</sup> |
| <i>RNAIII</i>            | 3.57                         | 3.39       | 16.99 ± 0.09         | 10.99 ± 0.07 | -1.06               | 1.21 ± 0.09               | 1.47 ± 0.12              |
| <i>agrA</i>              | 1.96                         |            |                      |              | 0.79                | 1.07 ± 0.04               | 1.15 ± 0.23              |
| <i>agrD</i>              |                              | 2.63       |                      |              | 0.82                |                           |                          |
| <i>saeS</i>              |                              | 3          |                      |              | 0.93                | 0.89 ± 0.11               | 1.05 ± 0.07              |
| <i>saeR</i>              |                              | 2.27       |                      |              | 0.93                |                           |                          |
| <i>rsbW</i>              |                              | 2.77       |                      |              | -1.76               |                           |                          |
| <i>rsbU</i> <sup>a</sup> |                              | 1.87       |                      |              |                     |                           |                          |
| <i>spa</i>               | -2.2                         | -3.96      | -18 ± 0.12           | -9 ± 0.08    | -4.75               | -2.57 ± 0.17              | -3.01 ± 0.26             |
| <i>hlgC</i>              | -2.97                        | -2.08      |                      |              | -4.66               | -2.94 ± 0.33              | -3.86 ± 0.61             |
| <i>lytM</i>              | 2.07                         |            |                      |              | -1.69               | -1.56 ± 0.21              | -1.39 ± 0.15             |
| <i>pbp1</i>              |                              | 2.32       |                      |              | -2.05               | -1.82 ± 0.26              |                          |

<sup>a</sup> RsbU is inactive in 8325, so *rsbU* microarray result was not presented.

<sup>b</sup> Data is from “Sun F, Ji Q, Jones MB, Deng X, Liang H, Frank B, Telser J, Peterson SN, Bae T, He C: AirSR, a [2Fe-2S] cluster-containing two-component system, mediates global oxygen sensing and redox signaling in *Staphylococcus aureus*. Journal of the American Chemical Society 2012, 134(1):305-314.”

<sup>c</sup> Data is obtained from total RNA of OD<sub>600</sub> = 2.0

<sup>d</sup> It is RT-qPCR data of *cap5B*
